# Supplementary material for: Karnofsky Performance Status (KPS) ≤60 Is Strongly Associated With Shorter Brain-Specific Progression-Free Survival Among Patients With Metastatic Breast Cancer With Brain Metastases
Source: PubMed Central journal article supplement (PMC9364681; doi:10.3389/fonc.2022.867462), 2022-07-27
Supplement: Table_1.pdf [file Table_1.pdf]

| <b>KPS</b> | <b>PPS</b> | <b>ECOG</b> | <b>Ambulation</b> | <b>Activity</b>                              | <b>Self-care</b>        | <b>PO intake</b> | <b>Cognition</b>              |  |
|------------|------------|-------------|-------------------|----------------------------------------------|-------------------------|------------------|-------------------------------|--|
| 100        | 100        | 0           | full              | normal; no evidence of disease               | full                    | full             | full                          |  |
| 90         | 90         | 1           |                   | normal; some evidence of disease             |                         |                  |                               |  |
| 80         | 80         |             |                   | normal with effort; some evidence of disease |                         |                  |                               |  |
| 70         | 70         | 2           | reduced           | unable to do job                             | occasional assistance   | full or reduced  | full or confused              |  |
| 60         | 60         |             |                   | unable to do hobby/housework                 |                         |                  |                               |  |
| 50         | 50         | 3           | mainly sitting    | unable to do any work                        | considerable assistance | full or reduced  | full, confused, or drowsy     |  |
| 40         | 40         |             | mainly lying down | unable to do most activity                   | mainly assistance       |                  |                               |  |
| 30         | 30         | 4           | bedbound          |                                              | total care              | minimal          |                               |  |
| 20         | 20         |             |                   |                                              |                         | mouth care only  |                               |  |
| 10         | 10         |             |                   |                                              |                         |                  | confused, drowsy, or comatose |  |
| 0          | 0          | 5           | dead              |                                              |                         |                  |                               |  |

*Supplementary Table 1: Calculation of Karnofsky Performance Status (“KPS”) scores. Pieces of information in the same row(s) are considered to represent equivalent KPS scores. Note that Palliative Performance Scale (“PPS”) scores correspond directly to equivalent KPS scores. Equivalent Eastern Cooperative Oncology Group (“ECOG”) are also displayed. The rightmost 5 columns of the table are the 5 components of the PPS score, which was calculated and translated into the corresponding KPS score.*
